# Supplementary material for: Interfering with Wnt signalling alters the periodicity of the segmentation clock
Source: PubMed Central journal article supplement (PMC2686089; doi:10.1016/j.ydbio.2009.02.035), 2009-06-01

# Gibb\_Supp Fig1

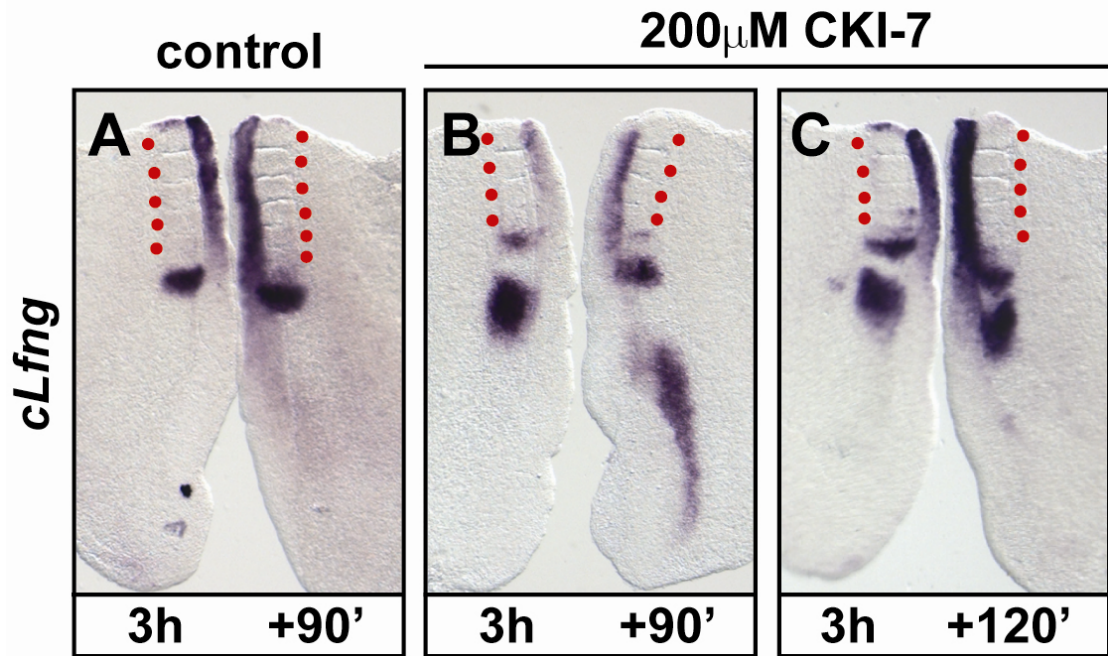

Supplement: mmc1.pdf [file mmc1.pdf]
